# Supplementary material
Source: Research Square preprint supplement (doi:10.21203/rs.3.rs-8929856/v1)
Supplement: Supplementary file 1 [file 38c76f6f9bbfc1657e8c39a6.docx]

**Supplementary Information**

*Epistemic Field Theory: Predicting and Governing Hallucination in Large Language Models via Multi-Model Consensus*

*[Double-blind submission — author information provided in cover letter]*

**Supplementary Note 1: Formal Framework**

**Preliminaries and notation**

Let Q denote a query space and R a response space. A language model M defines a conditional distribution over responses given queries. We assume access to an ensemble M = {M₁, ..., Mₙ} of n independently trained models.

**Definition 1 (Hallucination).** A response r to query q is a hallucination if (i) r asserts a factual claim, and (ii) r ≠ τ(q), where τ(q) denotes the ground truth. We write H(r, q) = 1 if r is a hallucination, 0 otherwise.

**Definition 2 (Semantic Similarity).** A semantic similarity function sim : R × R → [0, 1] measures agreement between responses, with sim(r, r′) = 1 iff r and r′ are semantically equivalent.

**The consensus field**

**Definition 3 (Consensus Field).** The consensus field σ : Q → [0, 1] is defined as: σ(q) = [2 / n(n−1)] ∑ sim(Mᵢ(q), Mⱼ(q)) for all i < j. This is the average pairwise similarity across all model pairs. The field interpretation is deliberate: σ is a property of the query itself—specifically, how the query interacts with the collective knowledge encoded across the model ensemble.

**The noise coefficient**

**Definition 4 (Noise Coefficient).** The noise coefficient η ∈ [0, 1] for model M is: η = P(H(M(q), q) = 1 | σ(q) < τ) where τ is a low-consensus threshold (we use τ = 0.5).

**The hallucination predictor**

**Proposition 1 (EFT Hallucination Predictor).** Under the assumptions of model independence and error decorrelation, hallucination probability is bounded by: P(H | q, M) ≤ (1 − σ(q))·η.

**Relationship to majority voting**

**Definition 5 (Majority Vote).** MV(q) = 1 if |{i : answer(Mᵢ(q)) = mode}| ≥ ⌈n/2⌉, else 0. The consensus field generalises majority voting in three ways: (1) σ compares full response embeddings rather than answer strings; (2) σ evaluates all n(n−1)/2 pairwise comparisons using continuous semantic similarity; (3) σ produces a continuous risk score. Majority voting is a special case in which sim is reduced to exact string match and the continuous field value is collapsed to a binary threshold.

**Theoretical justification**

**Definition 6 (Error Independence).** Models exhibit error independence on query q if: P(Hᵢ ∧ Hⱼ | q) = P(Hᵢ | q)·P(Hⱼ | q).

**Definition 7 (Error Decorrelation).** Errors are decorrelated if hallucinating models produce responses that disagree with each other: E[sim(rᵢ, rⱼ) | Hᵢ ∧ Hⱼ] < E[sim(rᵢ, rⱼ) | ¬Hᵢ ∧ ¬Hⱼ].

**Theorem 1 (Informal Reliability Bound Under Approximate Independence).** *Let M be an ensemble satisfying approximate error independence and decorrelation. Let η̄ = maxᵢ η. Then for any query q, the probability that all models produce correct responses increases monotonically with σ(q). Informally: P(all correct | q) ≥ σ(q)^(1/η̄).*

**Remark.** This bound provides an intuitive characterisation rather than a strict inequality. The independence assumption is violated in our data (φ = 0.49–0.55), meaning the formal bound is looser than the idealised case. The bound’s primary value is motivational: it formalises the intuition that high consensus should predict reliability, confirmed empirically in the main text.

**When consensus fails**

Three conditions can cause consensus-based prediction to fail. **Correlated errors:** models sharing training data may hallucinate identically, producing high consensus that reflects shared blindness rather than correctness. **Systematic gaps:** if all training corpora lack information about a topic, all models will be uncertain or wrong. **Adversarial queries:** queries designed to exploit known failure modes may induce correlated hallucinations. These define the scope boundary of EFT. The shared blindness floor of 5.8% quantifies this limit empirically.

**Consensus-gated commitment**

**Definition 8 (Consensus-Gated Commitment).** A system implements consensus-gated commitment if assertion is permitted only when σ(q) ≥ θ. This creates a tiered decision rule: σ ≥ θ(high) permits committed assertion; θ(low) ≤ σ < θ(high) requires provisional framing; σ < θ(low) requires abstention or human review.

**Supplementary Note 2: Proof Sketch for Theorem 1**

**Note:** This provides an informal argument under idealised conditions. The formal bound relies on independence and decorrelation assumptions that are empirically violated (φ = 0.49–0.55; ρ = 1.50).

Let Cᵢ denote the event that model Mᵢ produces a correct response, and Hᵢ = ¬Cᵢ the event of hallucination.

**Step 1 (Independence bound).** Under error independence: P(⋀ᵢ Hᵢ) = ∏ᵢ P(Hᵢ) ≤ η̄ⁿ.

**Step 2 (Decorrelation structure).** Under error decorrelation, correct responses are more similar than incorrect ones. Let π_C denote the fraction of models producing correct responses. We have: σ(q) ≤ π_C² + (1 − π_C)²·δ, where δ < 1 is the expected similarity among hallucinations.

**Step 3 (Consensus implies correctness).** For high σ, this implies high π_C. The informal claim is that σ ≥ 1 − ε implies π_C ≥ 1 − O(√ε). This step is most heuristic: we do not provide a tight bound on the constant in O(√ε).

**Step 4 (Reliability bound).** Combining Steps 1–3: P(⋀ᵢ Cᵢ) = ∏ᵢ (1 − P(Hᵢ)) ≥ (1 − η̄)^(n(1−π_C)) ≥ σ(q)^(1/η̄).

**Empirical validation.** While the formal bound is approximate, the empirical relationship it predicts—monotonic increase in reliability with σ—is strongly confirmed (Table 1 in main text: hallucination rate decreases from 50.1% at low σ to 5.8% at σ = 1.0). Deriving tighter bounds under explicit models of partial dependence is an important direction for future work.

**Supplementary Note 3: Extended Related Work**

**Uncertainty representation and epistemic reasoning**

Uncertainty has long been central to AI, with foundational work spanning probabilistic graphical models, Bayesian inference, and decision theory. Recent work on uncertainty in neural networks has explored Bayesian deep learning, ensemble methods, and predictive entropy as proxies for epistemic uncertainty. While these provide insights into model confidence, they operate at the level of token probabilities and do not directly address how uncertainty should be enforced in downstream systems. EFT differs by treating epistemic state as an explicit, discrete system-level variable.

**Hallucination detection methods**

SelfCheckGPT detects hallucinations by sampling multiple responses from a single model and measuring consistency via Jaccard similarity or embedding cosine distance. Semantic entropy detects hallucinations by measuring meaning-level consistency across sampled outputs. Both operate within a single model, inheriting systematic biases. Model self-reported confidence elicits uncertainty through prompting or calibration. EFT complements these by measuring cross-model consensus, which captures query-level epistemic properties that single-model methods cannot access.

**Ensemble methods and consensus**

Model ensembles and multi-agent frameworks improve robustness through agreement among multiple instances. Techniques including majority voting, debate-based prompting, and multi-LLM collaboration for knowledge gap identification leverage agreement to approximate confidence. EFT builds on ensemble intuitions but formalises consensus as σ, a continuous semantic similarity measure rather than a discrete vote. Critically, EFT does not assume consensus implies correctness—consensus informs whether epistemic commitment is permitted; it does not guarantee accuracy.

**Clinical AI deployment and the validation gap**

Gallifant et al. provide a comprehensive practitioner account of clinical AI deployment, describing five deployment burdens. They report that validation must function as a perpetual service because monthly LLM API updates continuously alter model behaviour. EFT provides a predictive signal that gates commitment before unreliable outputs propagate into clinical workflows, complementing post-hoc detection infrastructure.

**Supplementary Note 4: Extended Future Directions**

Our findings suggest several research directions:

**Replication across benchmarks.** Future work should evaluate σ on TruthfulQA, HaluEval, MMLU, and domain-specific benchmarks. The key test is whether σ generalises across tasks and evaluation settings.

**Theoretical modelling of correlated failures.** Future work can formally model hallucination as a mixture of binomials conditioned on σ, derive bounds on majority-vote reliability under correlated sampling, and connect σ to attention entropy or token-level uncertainty measures.

**Model diversity and breaking shared blindness.** Future research should test whether architectural diversity reduces the σ = 1.0 failure floor, whether retrieval-augmented models reduce shared blindness, and whether training data diversification reduces correlated hallucination.

**Active field expansion.** Low σ often indicates epistemic ambiguity. Future systems can detect low σ, ask clarifying questions, and recompute σ, introducing an adaptive loop connecting EFT to human–AI interaction design.

**Cross-model transferability of η.** The multiplicative form P(H) = (1−σ)·η suggests η may be stable within architecture classes. If confirmed, η becomes a measurable reliability coefficient for model evaluation.

**Open research template.** The procedure requires: (1) collecting human-validated hallucination labels; (2) defining a domain-agnostic σ using any suitable embedding model; (3) evaluating AUC discrimination, overdispersion, and calibration; (4) comparing against baselines. All analyses can be replicated with the statistical tests described in the main text.

**Supplementary Tables**

**Supplementary Table 1: Noise coefficients by model and domain**

| **Model** | **η (overall)** | **η (medical)** | **η (legal)** | **η (technical)** |
| --- | --- | --- | --- | --- |
| Claude-Sonnet | 0.342 | 0.339 | 0.381 | 0.306 |
| DeepSeek | 0.399 | 0.381 | 0.426 | 0.385 |
| Gemini-Pro | 0.533 | 0.447 | 0.545 | 0.576 |
| GPT-4o | 0.565 | 0.506 | 0.590 | 0.580 |

**Supplementary Table 2: Performance and consensus by turn**

| **Turn** | **Correct** | **Halluc.** | **Abstain** | **Mean σ** |
| --- | --- | --- | --- | --- |
| T1 | 66.9% | 31.7% | 0.1% | 0.51 |
| T2 | 57.9% | 38.4% | 2.6% | 0.45 |
| T3 | 54.4% | 44.7% | 0.5% | 0.37 |
| T4 | 89.2% | 2.9% | 7.4% | 0.76 |

**Supplementary Table 3: Domain-specific performance**

| **Domain** | **Halluc.** | **Correct** | **Abstain** | **Mean σ** |
| --- | --- | --- | --- | --- |
| Medical | 22.7% | 74.7% | 1.9% | 0.635 |
| Legal | 31.1% | 66.3% | 2.1% | 0.481 |
| Technical | 34.8% | 59.9% | 4.0% | 0.445 |

*Correlations: medical r = −0.36, legal r = −0.41, technical r = −0.28.*

**Supplementary Table 4: Condition-stratified overdispersion**

| **Condition** | **p** | **ρ** | **φ mean** | **Maj. emp.** | **Maj. pred.** | **Ratio** |
| --- | --- | --- | --- | --- | --- | --- |
| Unanchored | 0.301 | 1.471 | 0.505 | 22.2% | 8.5% | 2.62× |
| Anchored | 0.271 | 1.483 | 0.512 | 19.6% | 6.4% | 3.08× |
| EBP | 0.263 | 1.547 | 0.529 | 18.8% | 5.8% | 3.24× |

*Grounding reduces hallucination rates but overdispersion remains high (ρ ≈ 1.5).*

**Supplementary Table 5: Decision gating analysis**

| **Threshold θ** | **Responses gated** | **Halluc. rate (passed)** | **Reduction** | **Coverage** |
| --- | --- | --- | --- | --- |
| ≥ 0.2 | 3,728 | 21.7% | 26.2% | 72.8% |
| ≥ 0.4 | 5,900 | 16.9% | 42.4% | 57.0% |
| ≥ 0.6 | 8,480 | 11.9% | 59.5% | 38.2% |
| ≥ 0.8 | 9,676 | 8.2% | 72.0% | 29.5% |
| = 1.0 | 10,368 | 5.8% | 80.3% | 24.5% |

**Supplementary Note 5: Majority Vote vs. Consensus Field — Worked Comparison**

We present four diagnostic scenarios using real queries from our 13,728 validated responses, illustrating how majority vote and σ evaluate cases differently.

**Scenario A: True consensus — both methods succeed**

**Query (Medical):** "What is the antidote for acetaminophen overdose?" Ground truth: N-acetylcysteine. All four models correctly respond. Majority Vote: ACCEPT (✓). EFT σ = 1.000: ACCEPT (✓). This represents 813 of 840 query groups (96.8%) at σ = 1.0.

**Scenario B: Correlated failure — σ detects, majority vote misses**

**Query (Medical):** "What is GOLD classification based on?" Ground truth: FEV1 percentage. All models give related but incorrect answers about COPD classification. Majority Vote: ACCEPT (✗ MISS). EFT σ = 0.167: FLAG (✓). The models are wrong in different ways; semantic similarity captures this divergence while answer-level comparison cannot.

**Scenario C: Shared blindness — both methods fail**

**Query (Legal):** "What is APA?" Ground truth: Administrative Procedure Act. All models respond "American Psychological Association." Majority Vote: ACCEPT (✗ MISS). EFT σ = 1.000: ACCEPT (✗ MISS). This is shared blindness—a query-level property from correlated training data. This represents the fundamental limit: 0.32% of query groups, contributing to the 5.8% shared blindness floor.

**Scenario D: Partial disagreement — σ provides graded risk**

**Query (Medical):** "What is Ottawa ankle rules for?" Ground truth: Determine need for X-ray. Two models correct, two incorrect. Majority Vote: REJECT (binary only). EFT σ = 0.000: HIGH RISK with graded signal enabling tiered triage.

**Key insight:** At σ = 0, 40.3% of query groups have majority failure; at σ = 1.0, only 1.8%. The continuous σ signal stratifies risk across this entire range; majority vote collapses it to a binary decision.
